# Supplementary material for: A Highly Efficient Xylan-Utilization System in Aspergillus niger An76: A Functional-Proteomics Study
Source: Front Microbiol. 2018 Mar 22;9:430. doi: 10.3389/fmicb.2018.00430 (PMC5874446; doi:10.3389/fmicb.2018.00430)
Supplement: Supplementary file 2 [file Table2.XLSX]

## Sheet: Sheet1
Table S2 List of details of identifications and relative quantifications for proteins secreted by A. niger An-76 on xylose with different concentrations
0.05% Xylose
	Activity	Gene name	Family	Genome ID	Score	Coverage	Unique peptides	PSMs + SD	AAs	MW[kDa]	Calc. pI	Sequences	q-value	Notes
	Xylan-backbone degradation enzymes
Xylanase	Endo-1,4-beta-xylanase	xynC	GH10	g1233.t1	95.32	61.99	15	33 + 5.0	321	35	6.24	KYLGNIGDQYTLTK	0
		xynB	GH11	g10033.t1	658.68	36.44	5	256 + 27.0	225	24.1	5.47	TNAASIQGTATFTQYWSVR	0
		xynA	GH11	g9709.t1	253.57	10.9	1	61 + 4.0	211	22.5	4.26	TNEPSITGTSTFTQYFSVR	0
	β-xylosidase	xlnD	GH3	g662.t1	338.9	49.44	26	133 + 19.0	805	87.3	4.87	AASLISLFTLDELIANTGNTGLGVSR	0
		xlnB	GH43	g4894.t1	44	40.69	7	15 + 3.0	349	38.7	5.05	ILQGNDAVGTSTGHNSVFSPDGQDYYIVYHR	0
	Xylan accessory enzymes
	a-L-arabinofuranosidase	abnB	GH43	g3804.t1	42.13	56.44	10	19 + 4.0	326	35.4	4.93	HHcIGTAVSTTTDPSGPYIPNPTPLScR	0	C3(Carbamidomethyl); C27(Carbamidomethyl)
		axhA	GH62	g1234.t1	194.23	74.7	14	82 + 9.0	332	36	4.87	ANSGATWTEDISHGDLVR	0
		abfB	GH54	g3885.t1	445.73	41.28	13	149 + 32.0	499	52.6	4.46	YVVGSLVSGPSFTSGEVVSLR	0
		abfD	GH43	g4234.t1	25.98	30.2	10	15 + 2.0	543	60.3	5.26	TENFVVSPEGYPNTLR	0
	a-glucuronidase	aguA	GH67	g5372.t1	129.27	45.66	28	63 + 8.0	841	93.8	5.58	LHSGLTVIQHFYNAHYAGSEAAHGFIR	0
	Feruloyl esterase	faeB		g10211.t1	45.17	32.44	10	20 + 4.0	521	57.2	5.2	FFQISGMGHcGDGTGASYIGQGYGTYTSK	0
		faeA		g7596.t1	3.4	14.75	1	6 + 1.0	522	57	4.86	GYAAVGTDAGHVR	0
	Acetylxylan esterase	axeA		g7679.t1	20.53	26.97	2	8 + 2.0	304	32.7	5	QWSGVFGYDYSAPEK	0
0.15% Xylose
	Activity	Gene name	Family	Genome ID	Score	Coverage	Unique peptides	PSMs + SD	AAs	MW[kDa]	Calc. pI	Sequences	q-value	Notes
	Xylan-backbone degradation enzymes
Xylanase	Endo-1,4-beta-xylanase	xynC	GH10	g1233.t1	142.14	61.99	17	58 + 7.0	321	35	6.24	GHTLVWHSQLPSWVQAITDK	0
		xynB	GH11	g10033.t1	912.83	37.78	6	346 + 29.0	225	24.1	5.47	GTVTSDGSVYDIYTATR	0
		xynA	GH11	g9709.t1	255.4	10.9	1	69 + 9.0	211	22.5	4.26	TNEPSITGTSTFTQYFSVR	0
	β-xylosidase	xlnD	GH3	g662.t1	360.13	54.29	25	146 + 24.0	805	87.3	4.87	HYAGYDIENWHNHSR	0
	Xylan accessory enzymes
	a-L-arabinofuranosidase	axhA	GH62	g1234.t1	139.5	74.7	13	49 + 8.0	332	36	4.87	SIWVLAYQWGSSTFTYR	0
		abfB	GH54	g3885.t1	285.03	44.49	13	104 + 23.0	499	52.6	4.46	HYENVLYAASNGGVQTFDSK	0
		abfD	GH43	g4234.t1	28.13	31.12	9	17 + 2.0	543	60.3	5.26	TENFVVSPEGYPNTLR	0
	a-glucuronidase	aguA	GH67	g5372.t1	166.4	52.2	30	72 + 5.0	841	93.8	5.58	LHSGLTVIQHFYNAHYAGSEAAHGFIR	0
	Feruloyl esterase	faeB		g10211.t1	41.72	39.16	8	22 + 6.0	521	57.2	5.2	LLSYHGTQDPIISSTDSK	0
		faeA		g7596.t1	2.63	28.16	3	8 + 1.0	522	57	4.86	NVITDLYGQGPR	0
	Acetylxylan esterase	axeA		g7679.t1	28.64	12.17	2	8 + 3.0	304	32.7	5	MQIYHGSIDTTLYPQNYYETcK	0	C21(Carbamidomethyl)
0.75% Xylose
	Activity	Gene name	Family	Genome ID	Score	Coverage	Unique peptides	PSMs + SD	AAs	MW[kDa]	Calc. pI	Sequences	q-value	Notes
	Xylan-backbone degradation enzymes
Xylanase	Endo-1,4-beta-xylanase	xynC	GH10	g1233.t1	26.26	28.66	6	13 + 2.0	321	35	6.24	GQFSFSGSDYLVNFAQSNNK	0
		xynB	GH11	g10033.t1	1284.75	37.75	9	471 + 36.0	225	24.1	5.47	GTVTSDGSVYDIYTATRTNAASIQGTATFTQYWSVR	0
		xynA	GH11	g9709.t1	313.06	32.7	3	138 + 15.0	211	22.5	4.26	TNEPSITGTSTFTQYFSVR	0
	β-xylosidase	xlnD	GH3	g662.t1	308.16	52.17	29	132 + 16.0	805	87.3	4.87	AASLISLFTLDELIANTGNTGLGVSR	0
	Xylan accessory enzymes
	a-L-arabinofuranosidase	axhA	GH62	g1234.t1	652.17	76.51	16	227 + 23.0	332	36	4.87	SGWTALKDFTDVVSDGK	0
		abfB	GH54	g3885.t1	361.95	33.27	12	122 + 17.0	499	52.6	4.46	YVVGSLVSGPSFTSGEVVSLR	0
		abfD	GH43	g4234.t1	20.84	19.52	7	12 + 2.0	543	60.3	5.26	GNYDGLLPGQTISVPK	0
	a-glucuronidase	aguA	GH67	g5372.t1	146.85	48.87	27	63 + 10.0	841	93.8	5.58	LHSGLTVIQHFYNAHYAGSEAAHGFIR	0
	Feruloyl esterase	faeB		g10211.t1	30.1	35.7	6	13 + 2.0	521	57.2	5.2	VANALNAAPSELDEFYR	0
	Acetylxylan esterase	axeA		g7679.t1	129.64	26.97	6	42 + 5.0	304	32.7	5	MQIYHGSIDTTLYPQNYYETcK	0	C21(Carbamidomethyl)
1% Xylose
	Activity	Gene name	Family	Genome ID	Score	Coverage	Unique peptides	PSMs + SD	AAs	MW[kDa]	Calc. pI	Sequences	q-value
	Xylan-backbone degradation enzymes
Xylanase	Endo-1,4-beta-xylanase	xynC	GH10	g1233.t1	788.87	78.82	32	257 + 32.0	321	35	6.24	GHTLVWHSQLPSWVQAITDKNTLIEVMK	0
		xynB	GH11	g10033.t1	1389.77	37.78	9	505 + 76.0	225	24.1	5.47	GTVTSDGSVYDIYTATRTNAASIQGTATFTQYWSVR	0
		xynA	GH11	g9709.t1	350.98	32.7	3	145 + 9.0	211	22.5	4.26	TNEPSITGTSTFTQYFSVR	0
	β-xylosidase	xlnD	GH3	g662.t1	271.47	48.2	27	115 + 11.0	805	87.3	4.87	TLIHQIASIISTQGR	0
	Xylan accessory enzymes
	a-L-arabinofuranosidase	axhA	GH62	g1234.t1	692.06	76.51	16	248 + 24.0	332	36	4.87	SSMSINDFPGSFGSQYEVILSGAR	0
		abfB	GH54	g3885.t1	286.36	49.5	12	97 + 12.0	499	52.6	4.46	HYENVLYAASNGGVQTFDSK	0
		abfD	GH43	g4234.t1	29.38	24.31	10	13 + 2.0	543	60.3	5.26	GIAVGEGGWVDQPDRVDFAPGSAIPAHFVYWR	0
	a-glucuronidase	aguA	GH67	g5372.t1	152.82	46.37	26	69 + 11.0	841	93.8	5.58	LHSGLTVIQHFYNAHYAGSEAAHGFIR	0
	Feruloyl esterase	faeB		g10211.t1	8.74	7.29	2	4 + 0.0	521	57.2	5.2	SHLWAEAWLPR	0
		faeA		g7596.t1	2.34	37.93	1	10 + 1.0	522	57	4.86	GYAAVGTDAGHVR	0
	Acetylxylan esterase	axeA		g7679.t1	122.15	26.97	5	40 + 3.0	304	32.7	5	MQIYHGSIDTTLYPQNYYETcK	0	C21(Carbamidomethyl)
