# Supplementary material for: A Highly Efficient Xylan-Utilization System in Aspergillus niger An76: A Functional-Proteomics Study
Source: Front Microbiol. 2018 Mar 22;9:430. doi: 10.3389/fmicb.2018.00430 (PMC5874446; doi:10.3389/fmicb.2018.00430)
Supplement: Supplementary file 5 [file Table5.XLSX]

## Sheet: Sheet1
Table S5 List of details of identifications and relative quantifications for sugar transporters of A. niger An-76 grown on XOS
1 day on XOS
	Activity	Genome ID	Score	Coverage	Unique peptides	PSMs + SD	AAs	MW[kDa]	Calc. pI	Sequences	q-value	Notes
	MFS monosaccharide transporter	g7878.t1	7.95	22.01	3	8 + 0.0	568	61.4	5.5	KKYPQYQDGSFK	0
	Monosaccharide transporter	g903.t1	18.09	28.21	4	11 + 2.0	560	61.8	6.15	WVAGLGVGALSSIVPMYQSESAPR	0
	Sucrose transport protein	g10273.t1	11.2	25.31	5	17 + 4.0	1047	117.6	7.21	FGNEFFNATWNR	0
	Hexose transporter	g1121.t1	1.91	19.25	1	10 + 1.0	982	108.1	5.62	VLALVHAK	0
	MFS sugar transporter	g3670.t1	2.11	26.76	1	11 + 5.0	512	55.9	5.57	FPLAFQIVLSLMVmAFVIFFPESPR	0.013	M14(Oxidation)
	MFS sugar transporter	g3946.t1	1.6	19.68	1	4 + 1.0	554	61.3	5.64	STGEVIDDLFHLR	0
	MFS sugar transporter	g6482.t1	2.57	22.29	1	11 + 2.0	525	58.2	7.78	LSAYGNVWNAVLK	0
	MFS sugar transporter	g9099.t1	1.61	25.54	1	6 + 1.0	513	56.9	7.97	VFMLSGAGmcIcmIVLTITTKFSDASR	0
	MFS sugar transporter	g9711.t1	1.59	24.41	1	6 + 0.0	493	53.3	6.1	YVTDVGIGEPDGTVTDTTHQGGIVSIYYLGcIFGcFGGGWLADR	0.028	C31(Carbamidomethyl); C35(Carbamidomethyl)
	Sugar transporter	g4745.t1	16.37	23.89	4	10 + 1.0	540	59.5	6.61	KDRWEEcHAVLTLVHGQGDPNSPFVLR	0	C7(Carbamidomethyl)
2 day on XOS
	Activity	Gene ID	Score	Coverage	Unique peptides	PSMs	AAs	MW[kDa]	Calc. pI	Sequences	q-value	Notes
	MFS monosaccharide transporter	g2755.t1	1.61	13.88	2	7 + 1.0	994	109.9	9.16	LGADSAIPGLDIDPPNVSSSTGSKPGR	0.001
	MFS monosaccharide transporter	g7878.t1	5.17	12.15	1	6 + 0.0	568	61.4	5.5	KKYPQYQDGSFK	0
	Monosaccharide transporter	g903.t1	2.29	13.57	1	6 + 2.0	560	61.8	6.15	AAGQAAWHELFTGPR	0
	Sucrose transport protein	g10273.t1	40.56	32.09	15	32 + 5.0	1047	117.6	7.21	IFTPLLHYLDDNKEIIPMEYPYGSR	0
	Hexose transporter	g1121.t1	2.04	18.33	1	13 + 2.0	982	108.1	5.62	VLALVHAK	0
	MFS sugar transporter	g6482.t1	3.24	2.48	1	1 + 0.0	525	58.2	7.78	LSAYGNVWNAVLK	0
	Sugar transporter	g9754.t1	1.59	23.13	2	11 + 2.0	882	97.6	6.61	TVLVGTTVmAIGALLQASSYSVGQmmAGR	0	M9(Oxidation); M25(Oxidation); M26(Oxidation)
	Sugar transporter	g4052.t1	1.46	15.05	1	4 + 0.0	525	56.3	8.54	IISPVAALAPFVDK	0.039
	Monocarboxylate transporter	g5675.t1	2.51	10.44	1	8 + 1.0	987	109	7.93	GLAMGIIISGTGVGGmIWPPALR	0.019	M16(Oxidation)
	Major facilitator superfamily transporter	g8983.t1	1.56	21.41	1	6 + 3.0	481	53.3	8.62	EALLSPMTWIYcLmGIcITLTTPIMK	0.043	C12(Carbamidomethyl); M14(Oxidation); C17(Carbamidomethyl)
	Major facilitator superfamily transporter	g10168.t1	1.36	16.44	1	6 + 2.0	596	64.9	6.2	YcAAGGmTVVGIPFYSNMGVHWTLTILGAISALMTPVPYVFYRVK	0.013	C2(Carbamidomethyl); M7(Oxidation)
3 day on XOS
	Activity	Genome ID	Score	Coverage	Unique peptides	PSMs	AAs	MW[kDa]	Calc. pI	Sequences	q-value	Notes
	MFS monosaccharide transporter	g7878.t1	2.6	14.79	2	5 + 1.0	568	61.4	5.5	KKYPQYQDGSFK	0
	Sucrose transport protein	g10273.t1	26.56	26.36	12	25 + 3.0	1047	117.6	7.21	IFTPLLHYLDDNKEIIPMEYPYGSR	0
	Hexose transporter	g1121.t1	2.13	18.33	1	11 + 1.0	982	108.1	5.62	VLALVHAK	0
	MFS sugar transporter	g3946.t1	1.6	18.41	1	4 + 0.0	554	61.3	5.64	AAQGIYLTGIVLYQAFFGSYAcLTWVVPAEVFPTYLR	0.029	C22(Carbamidomethyl)
	Sugar transporter	g4675.t1	1.62	10.82	1	5 + 1.0	795	85	6.24	IYcAMGDLVcDGTLIVTAAHFTYVmNTGEASQWLESK	0.023	C3(Carbamidomethyl); C10(Carbamidomethyl); M25(Oxidation)
	Sugar transporter	g8263.t1	1.6	7.35	1	5 + 0.0	1116	123.1	5.4	STLLKR	0.015
4 day on XOS
	Activity	Genome ID	Score	Coverage	Unique peptides	PSMs	AAs	MW[kDa]	Calc. pI	Sequences	q-value	Notes
	MFS monosaccharide transporter	g2755.t1	1.6	10.46	1	5 + 1.0	994	109.9	9.16	LGADSAIPGLDIDPPNVSSSTGSKPGR	0
	Monosaccharide transporter	g8461.t1	1.76	8.49	1	4 + 0.0	530	58	6.27	GSLFSPNSNLR	0.001
	Sucrose transport protein	g10273.t1	13.28	19.96	6	17 + 2.0	1047	117.6	7.21	HLEEIEKGQKEQNR	0
	Hexose transporter	g1121.t1	2.28	15.99	2	10 + 3.0	982	108.1	5.62	VLALVHAK	0
	Sugar transporter	g9754.t1	1.61	5.56	1	3 + 0.0	882	97.6	6.61	KLPSIR	0.035
	Sugar transporter	g4675.t1	2.41	22.14	1	8 + 2.0	795	85	6.24	LIVAMVYIYmIVYNLSLGPAVWVVTSEIAAGPNR	0	M10(Oxidation)
	Sugar transporter	g10030.t1	2.17	21.91	1	8 + 0.0	575	63.5	6.55	HREEEATAALSK	0
	Sugar transporter	g4434.t1	1.6	6.45	1	3 + 1.0	558	60.3	7.69	YmVDLK	0.021	M2(Oxidation)
	monocarboxylate transporter	g5675.t1	1.6	11.04	1	7 + 2.0	987	109	7.93	GLAMGIIISGTGVGGmIWPPALR	0.002	M16(Oxidation)
5 day on XOS
	Activity	Genome ID	Score	Coverage	Unique peptides	PSMs	AAs	MW[kDa]	Calc. pI	Sequences	q-value	Notes
	MFS monosaccharide transporter	g2755.t1	5.67	1.51	2	2 + 0.0	994	109.9	9.16	HKGSESTGQAGQYR	0
	MFS monosaccharide transporter	g572.t1	10.66	6.3	5	6 + 1.0	540	60.3	6.13	VANEEPHMYGK	0
	Monosaccharide transporter	g8461.t1	13.36	5.28	2	4 + 0.0	530	58	6.27	WRPHGTFTAEMGLTANAVAEK	0
	Sucrose transport protein	g10273.t1	37.92	12.13	9	12 + 2.0	1047	117.6	7.21	HLEEIEKGQKEQNR	0
	Hexose transporter	g1121.t1	17.84	7.84	6	7 + 1.0	982	108.1	5.62	DVTYLDLFKPR	0
	Sugar transporter	g10030.t1	6.77	2.09	1	2 + 0.0	575	63.5	6.55	HREEEATAALSK	0
